# Supplementary material for: A critical perspective on rechargeable Al-ion battery technology
Source: Royal Society of Chemistry journal article supplement (doi:10.1039/c9dt02132a), 2019-01-01
Supplement: c9dt02132a1.pdf [file c9dt02132a1.pdf]

## Supplementary Information

# Analysis of critical aspects in Al-ion battery technology

*David Muñoz-Torrero<sup>[a]</sup>, Jesús Palma<sup>[a]</sup>, Rebeca Marcilla<sup>[a]</sup>, Edgar Ventosa<sup>[a]</sup>\**

<sup>a</sup>Electrochemical Processes Unit. IMDEA Energy, Parque Tecnológico de Móstoles,  
Avda, Ramón de la Sagra 3, 28935 Móstoles, Madrid. Spain.

Email: [edgar.ventosa@imdea.org](mailto:edgar.ventosa@imdea.org)

**Table S1.** Energy density, life cycle, specific power, safety and battery cost data for Al-ion, Li-ion and Lead-Acid batteries.

| Properties                            | Al-ion Battery     | Li-ion Battery    | Lead-Acid Battery |
|---------------------------------------|--------------------|-------------------|-------------------|
| Energy density (Wh kg <sup>-1</sup> ) | 65 <sup>1</sup>    | 180 <sup>2</sup>  | 40 <sup>2</sup>   |
| Life cycle (times)                    | 20000 <sup>3</sup> | 3600 <sup>4</sup> | 500 <sup>4</sup>  |
| Specific Power (kW kg <sup>-1</sup> ) | 4.36 <sup>1</sup>  | 1.05 <sup>5</sup> | 0.25 <sup>2</sup> |
| Safety                                | High               | Medium-Low        | Medium-High       |
| Battery Cost (USD KWh <sup>-1</sup> ) | 900                | 270 <sup>4</sup>  | 150 <sup>2</sup>  |

## References

- 1 S. Wang, K. V. Kravchyk, F. Krumeich and M. V. Kovalenko, *ACS Appl. Mater. Interfaces*, 2017, **9**, 28478–28485.
- 2 G. J. May, A. Davidson and B. Monahov, *J. Energy Storage*, 2018, **15**, 145–157.
- 3 C.-J. Pan, C. Yuan, G. Zhu, Q. Zhang, C.-J. Huang, M.-C. Lin, M. Angell, B.-J. Hwang, P. Kaghazchi and H. Dai, *Proc. Natl. Acad. Sci.*, 2018, **115**, 5670–5675.
- 4 C. C. Chan and Y. S. Wong, *IEEE Power Energy Mag.*, 2004, **2**, 24–33.
- 5 M. Agostini, S. Brutti, M. A. Navarra, S. Panero, P. Reale, A. Matic and B. Scrosati, *Sci. Rep.*, 2017, **7**, 1104.
